# Supplementary material for: T Cell Production of IFNγ in Response to TLR7/IL-12 Stimulates Optimal B Cell Responses to Viruses
Source: PubMed Central journal article supplement (PMC5120817; doi:10.1371/journal.pone.0166322), 2016-11-23
Supplement: pone.0166322.s001.pdf [file pone.0166322.s001.pdf]

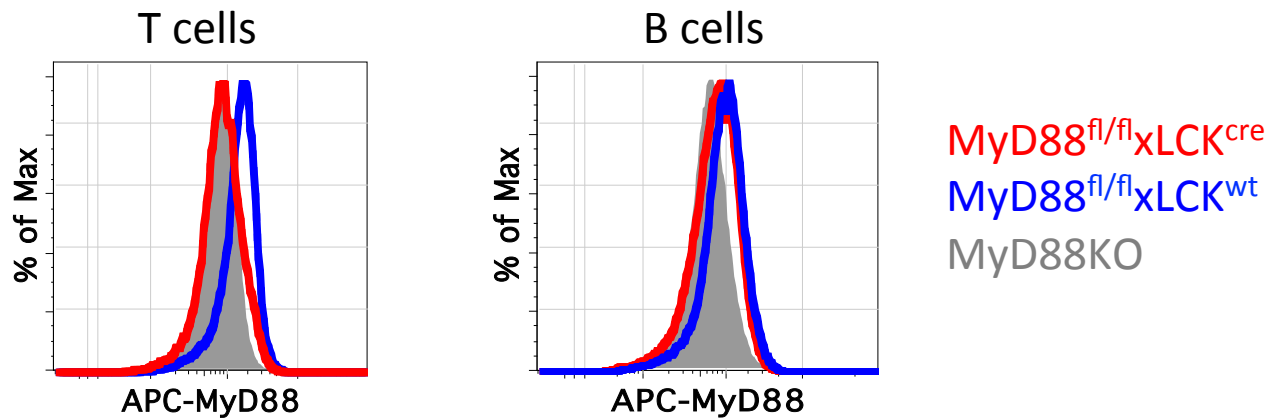

S1 Fig. T cell specific deletion of MyD88 in  $MyD88^{fl/fl} \times LCK^{cre}$  mice. Splenocytes from  $MyD88^{fl/fl} \times LCK^{cre}$  (red line),  $MyD88^{fl/fl} \times LCK^{wt}$  (blue line) or  $MyD88KO$  (gray solid histogram) were stained for surface markers and intracellularly stained for MyD88. MyD88 expression on T cells or B cells is shown.
